# Supplementary material for: Glacier loss and vegetation expansion alter organic and inorganic carbon dynamics in high-mountain streams
Source: Copernicus journal article supplement (doi:10.5194/bg-20-2301-2023), 2023-06-21
Supplement: Supplementary file 1 [file bg-20-2301-2023-supplement.pdf]

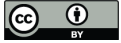

*Supplement of*

## **Glacier loss and vegetation expansion alter organic and inorganic carbon dynamics in high-mountain streams**

**Andrew L. Robison et al.**

*Correspondence to:* Andrew L. Robison ([andrew.robison@epfl.ch](mailto:andrew.robison@epfl.ch))

The copyright of individual parts of the supplement might differ from the article licence.

1 **Supplementary information**

2

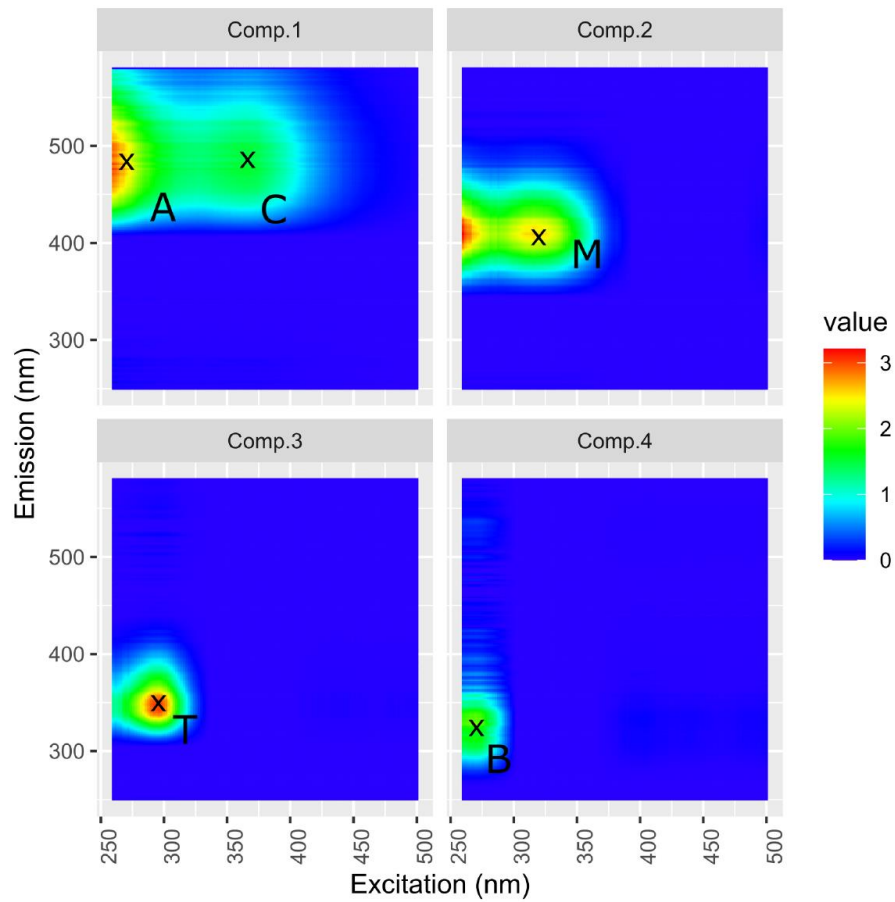

3

4 Figure S1: Contour plots that describe emission intensities as a function of excitation  
5 wavelengths for the four components of the PARAFAC model. The approximate location of  
6 the five Coble peaks are overlaid (Coble et al., 1998, 1990).

7

8 Table S1: Partial least squares (PLS) model VIP scores and coefficients for variables  
9 identified as highly ( $VIP \geq 1.0$ ) or moderately ( $0.8 \leq VIP < 1.0$ ) influential in predicting  
10 median CO<sub>2</sub> saturation.

| <b>Variable</b>            | <b>VIP score</b> | <b>Coefficient</b> |
|----------------------------|------------------|--------------------|
| Specific conductivity      | 3.03             | -0.43              |
| Sulfate                    | 1.86             | 0.10               |
| Calcium                    | 2.04             | 0.68               |
| DOC                        | 0.77             | -0.09              |
| Total suspended solids     | 1.66             | -0.82              |
| Elevation                  | 2.67             | 0.48               |
| Catchment area             | 1.73             | -0.53              |
| Runoff                     | 1.45             | 0.74               |
| Catchment glacier cover    | 1.95             | -0.31              |
| Catchment vegetation cover | 1.31             | -0.45              |

11

12 Table S2: Median concentration and interquartile range of major ions measured at the twelve monitoring sites.

| Site | Ca <sup>2+</sup> | Mg <sup>2+</sup> | K <sup>+</sup> | Na <sup>+</sup> | Cl <sup>-</sup> | SO <sub>4</sub> <sup>2-</sup> | NO <sub>3</sub> <sup>-</sup> |
|------|------------------|------------------|----------------|-----------------|-----------------|-------------------------------|------------------------------|
| VAU  | 23.3 (9.9)       | 5.1 (3.3)        | 0.73 (0.26)    | 0.57 (0.39)     | 0.11 (0.06)     | 37.8 (25.2)                   | 0.59 (0.27)                  |
| VAD  | 22.7 (8.6)       | 4.7 (2.9)        | 0.67 (0.20)    | 0.65 (0.47)     | 0.11 (0.05)     | 36.5 (16.8)                   | 0.52 (0.30)                  |
| VEL  | 21.1 (11.1)      | 6.5 (3.9)        | 0.64 (0.14)    | 0.88 (0.25)     | 0.12 (0.05)     | 27.9 (20.0)                   | 0.43 (0.30)                  |
| FEU  | 46.5 (16.4)      | 6.5 (3.4)        | 0.27 (0.12)    | 0.53 (0.73)     | 0.28 (0.42)     | 51.2 (29.7)                   | 0.49 (0.18)                  |
| FED  | 56.5 (15.6)      | 6.3 (3.2)        | 0.29 (0.11)    | 0.89 (0.71)     | 0.53 (0.58)     | 55.4 (39.1)                   | 0.45 (0.20)                  |
| PEU  | 70.7 (48.3)      | 7.4 (5.4)        | 0.21 (0.14)    | 0.32 (0.33)     | 0.31 (0.16)     | 100 (110)                     | 0.22 (0.08)                  |
| ANU  | 38.9 (5.1)       | 3.6 (0.7)        | 0.13 (0.06)    | 0.30 (0.26)     | 0.12 (0.08)     | 12.9 (5.3)                    | 0.79 (0.31)                  |
| AND  | 40.5 (6.0)       | 3.8 (0.9)        | 0.12 (0.09)    | 0.35 (0.18)     | 0.15 (0.13)     | 14.2 (6.0)                    | 0.76 (0.30)                  |
| RIC  | 46.6 (13.4)      | 5.3 (1.0)        | 0.12 (0.07)    | 0.32 (0.20)     | 0.16 (0.09)     | 11.6 (3.7)                    | 0.85 (0.28)                  |
| VIU  | 56.3 (14.2)      | 8.1 (2.8)        | 0.33 (0.15)    | 1.4 (0.3)       | 0.20 (0.11)     | 53.0 (31.2)                   | 0.24 (0.20)                  |
| VIM  | 48.8 (13.4)      | 7.0 (2.4)        | 0.41 (0.16)    | 1.4 (0.7)       | 0.18 (0.25)     | 35.5 (19.2)                   | 0.27 (0.14)                  |
| VID  | 87.0 (50.0)      | 11.1 (4.3)       | 0.48 (0.25)    | 1.4 (1.0)       | 0.34 (0.17)     | 132 (133)                     | 0.65 (0.31)                  |

13
